# Supplementary material for: Petrological characteristics of the Neoproterozoic Ess ophiolite mantle section, Arabian Shield, Saudi Arabia: a mineral chemistry perspective
Source: Springer Nature journal article supplement (doi:10.1007/s00531-019-01799-3), 2019-12-03
Supplement: MOESM1 [file 531_2019_1799_MOESM1_ESM.xlsx]

## Sheet: Sheet1
Table S1 . Microprobe analyses of fresh olivine in the serpentinized dunite of Jabal Ess ophiolite.
Sample	ESSD-23													ESSD-7
Analysis	Ol-1	Ol-2	Ol-3	Ol-4	Ol-5	Ol-6	Ol-7	Ol-8	Ol-9	Ol-10	Ol-11	Ol-12	Ol-13	Ol-1	Ol-2	Ol-3	Ol-4	Ol-5	Ol-6	Ol-7	Ol-8	Ol-9	Ol-10	Ol-11	OL-12	OL-13	OL-14
SiO2	41.108	41.069	40.814	41.299	40.938	40.948	41.164	40.778	40.988	40.633	40.977	40.984	41.102	41.077	40.772	40.948	40.778	41.365	41.045	40.845	40.865	40.892	40.865	40.581	40.982	40.297	40.959
TiO2	0	0.004	0.007	0.005	0.006	0.01	0.007	0.004	0.001	0.017	0	0	0.01	0.011	0	0.004	0.002	0.007	0.013	0	0.01	0.013	0.012	0.004	0.004	0.003	0.013
Al2O3	0.007	0.007	0.003	0	0	0.006	0	0.01	0	0	0	0.001	0.006	0.009	0.015	0	0.011	0.006	0.005	0	0.004	0.006	0.003	0	0.006	0.006	0.006
Cr2O3	0.035	0.019	0.019	0	0.023	0.015	0.028	0.007	0.027	0	0.018	0.007	0.014	0.006	0.052	0	0.022	0.012	0.056	0.017	0.023	0.01	0.036	0.004	0.007	0.02	0.012
FeO	8.009	8.053	8.112	6.858	7.829	8.108	7.18	8.004	8.267	8.33	7.733	8.301	7.788	8.101	8.396	7.959	8.199	7.096	7.349	7.556	7.872	8.149	8.346	8.269	8.546	8.112	7.459
MnO	0.134	0.136	0.125	0.201	0.133	0.129	0.187	0.146	0.129	0.116	0.176	0.116	0.176	0.138	0.139	0.117	0.155	0.195	0.16	0.169	0.134	0.121	0.108	0.115	0.112	0.134	0.203
MgO	50.255	50.394	50.419	50.938	50.605	50.053	51.109	50.525	50.054	50.097	50.78	49.998	50.8	50.259	50.241	50.089	50.247	50.929	50.945	50.778	50.857	50.151	50.371	50.075	49.728	50.212	51.006
NiO	0.43	0.45	0.35	0.379	0.47	0.459	0.41	0.489	0.453	0.436	0.372	0.393	0.412	0.401	0.467	0.429	0.432	0.446	0.316	0.387	0.412	0.451	0.43	0.42	0.4	0.37	0.43
CaO	0.029	0.032	0.025	0.039	0.017	0.016	0.034	0.032	0.035	0.037	0.024	0.044	0.037	0.008	0.024	0.021	0.028	0.029	0.057	0.027	0.037	0.04	0.025	0.036	0.029	0.034	0.031
Total	100.01	100.16	99.88	99.72	100.02	99.74	100.12	100	99.95	99.67	100.08	99.84	100.35	100.01	100.11	99.57	99.87	100.09	99.95	99.78	100.21	99.83	100.19	99.51	99.82	99.19	100.12
Si	1	0.998	0.995	1.002	0.996	1	0.997	0.994	0.999	0.995	0.996	1	0.996	1	0.994	1.001	0.995	1.002	0.997	0.995	0.993	0.998	0.995	0.995	1.001	0.991	0.994
Al	0	0	0	0	0	0	0	0	0	0	0	0	0	0	0	0	0	0	0	0	0	0	0	0	0	0	0
Ti	0	0	0	0	0	0	0	0	0	0	0	0	0	0	0	0	0	0	0	0	0	0	0	0	0	0	0
Fe2	0.163	0.164	0.165	0.139	0.159	0.166	0.145	0.163	0.169	0.171	0.157	0.169	0.158	0.165	0.171	0.163	0.167	0.144	0.149	0.154	0.16	0.166	0.17	0.169	0.175	0.167	0.151
Mn	0.003	0.003	0.003	0.004	0.003	0.003	0.004	0.003	0.003	0.002	0.004	0.002	0.004	0.003	0.003	0.002	0.003	0.004	0.003	0.003	0.003	0.003	0.002	0.002	0.002	0.003	0.004
Mg	1.823	1.826	1.833	1.843	1.835	1.822	1.846	1.835	1.819	1.828	1.839	1.819	1.836	1.824	1.826	1.825	1.828	1.839	1.844	1.844	1.842	1.824	1.828	1.83	1.811	1.84	1.846
Ca	0.001	0.001	0.001	0.001	0	0	0.001	0.001	0.001	0.001	0.001	0.001	0.001	0	0.001	0.001	0.001	0.001	0.001	0.001	0.001	0.001	0.001	0.001	0.001	0.001	0.001
Ni	0.008	0.009	0.007	0.007	0.009	0.009	0.008	0.01	0.009	0.009	0.007	0.008	0.008	0.008	0.009	0.008	0.008	0.009	0.006	0.008	0.008	0.009	0.008	0.008	0.008	0.007	0.008
Fo	91.7936	91.7732	91.7216	92.9778	92.0144	91.6699	92.695	91.8386	91.5206	91.4682	92.1297	91.4799	92.081	91.7078	91.4289	91.8159	91.6141	92.7506	92.5136	92.2956	92.0107	91.6463	91.4957	91.5219	91.2072	91.6903	92.4185
